# Supplementary material for: Kinetic and mechanistic studies on reactions of diruthenium(ii,iii) with biologically relevant reducing agents
Source: Royal Society of Chemistry journal article supplement (doi:10.1039/c3dt51763b), 2013-01-01
Supplement: c3dt51763b.pdf [file c3dt51763b.pdf]

## Electronic Supplementary Information (ESI)

### Kinetic and mechanistic studies on reactions of diruthenium(II,III) with biologically relevant reducing agents

Rodrigo Luis Silva Ribeiro Santos<sup>a,b,c</sup>; Rudi van Eldik<sup>b,\*</sup>; Denise de  
Oliveira Silva<sup>a,\*</sup>

<sup>a</sup> Departamento de Química Fundamental, Instituto de Química, Universidade de São Paulo, Av. Prof. Lineu Prestes, 748, CEP 05508-000, São Paulo, SP, Brazil.

<sup>b</sup> Inorganic Chemistry, Department of Chemistry and Pharmacy, University of Erlangen-Nuremberg, Egerlandstr. 1, 91058 Erlangen, Germany

<sup>c</sup> Present address: Departamento de Ciências Exatas e Tecnológicas, Universidade Estadual de Santa Cruz, Rod Jorge Amado, km 16, Ilheus BA, Brazil

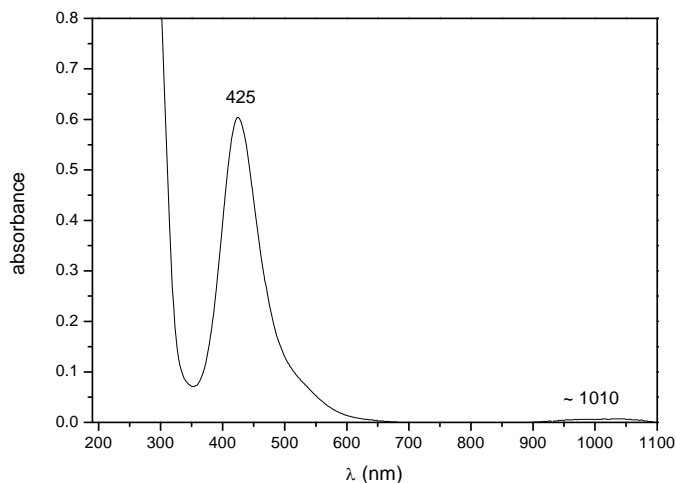

Fig. S1 – Typical electronic spectrum of the diaqua-Ru<sub>2</sub> complex. [Ru<sub>2</sub>(CH<sub>3</sub>COO)<sub>4</sub>Cl] ( $8.4 \times 10^{-4}$  mol L<sup>-1</sup>) dissolved in acetate buffer pH 5.0 ( $2.0 \times 10^{-2}$  mol L<sup>-1</sup>)

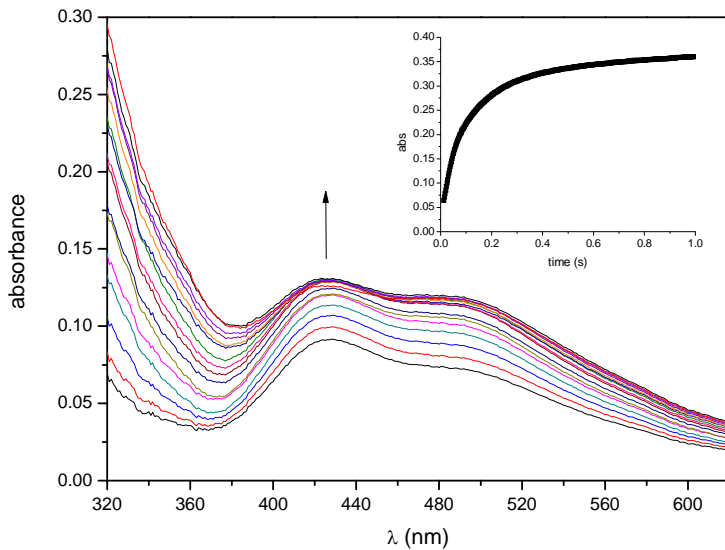

Fig. S2 – UV-Vis spectra recorded after addition of a 10 fold excess of glutathione to [Ru<sub>2</sub>(CH<sub>3</sub>COO)<sub>4</sub>(H<sub>2</sub>O)<sub>2</sub>]<sup>+</sup> during the reaction up to 0.06 s. [Ru<sub>2</sub>(CH<sub>3</sub>COO)<sub>4</sub>(H<sub>2</sub>O)<sub>2</sub>]<sup>+</sup> =  $1.0 \times 10^{-4}$  mol L<sup>-1</sup>, [GSH] =  $1.0 \times 10^{-3}$  mol L<sup>-1</sup>, 10 °C, pH 5.0. Inset: kinetic trace (0 – 1 s) fitted to a double exponential function ( $\lambda = 350$  nm)

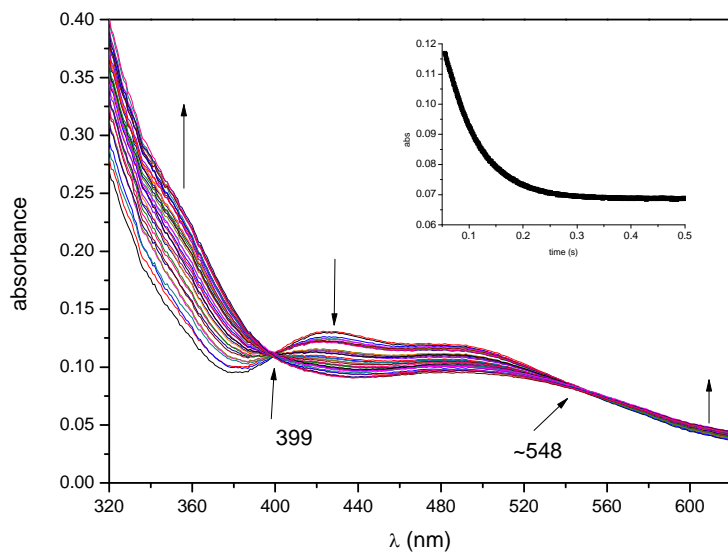

Fig. S3 – UV-Vis spectra recorded after addition of a 10 fold excess of glutathione to  $[\text{Ru}_2(\text{CH}_3\text{COO})_4(\text{H}_2\text{O})_2]^+$  during the reaction between 0.06 and 0.2 s.  $[\text{Ru}_2(\text{CH}_3\text{COO})_4(\text{H}_2\text{O})_2]^+ = 1.0 \times 10^{-4} \text{ mol L}^{-1}$ ,  $[\text{GSH}] = 1.0 \times 10^{-3} \text{ mol L}^{-1}$ ,  $10^\circ\text{C}$ , pH 5.0 Inset: kinetic trace (0.06 – 0.5 s) fitted to a single exponential function ( $\lambda = 425 \text{ nm}$ )

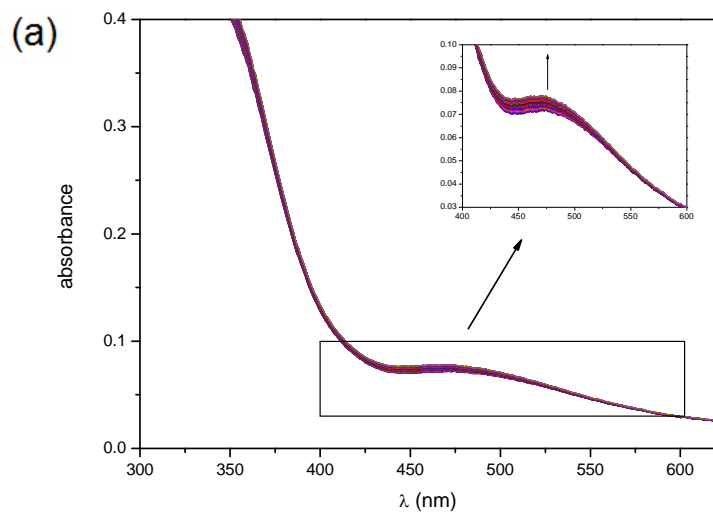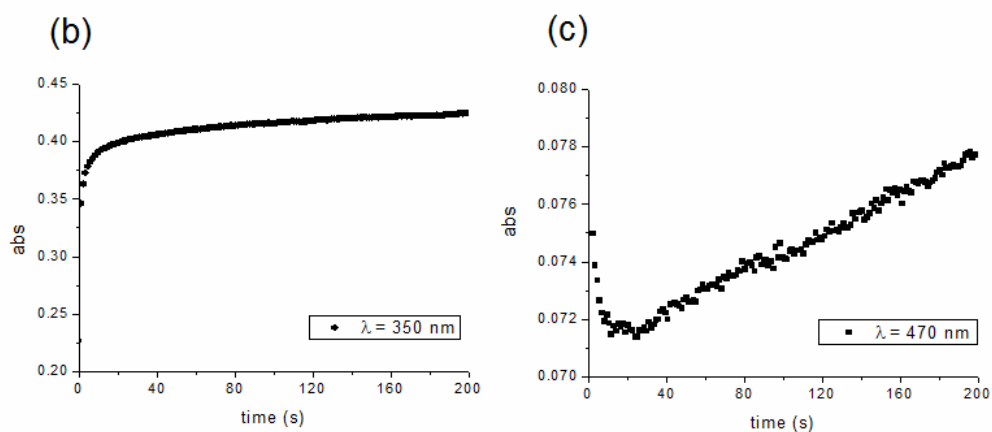

Fig. S4 – UV-Vis spectra recorded after addition of a 10 fold excess of glutathione to  $[\text{Ru}_2(\text{CH}_3\text{COO})_4(\text{H}_2\text{O})_2]^+$  during the reaction between 25 and 200 s (a); kinetic trace recorded between the range 2 – 200 s at 350 nm (b); at 470 nm (c) ( $[\text{Ru}_2(\text{CH}_3\text{COO})_4(\text{H}_2\text{O})_2]^+ = 1.0 \times 10^{-4} \text{ mol L}^{-1}$ ,  $[\text{GSH}] = 1.0 \times 10^{-3} \text{ mol L}^{-1}$ ,  $10^\circ\text{C}$ , pH 5.0)

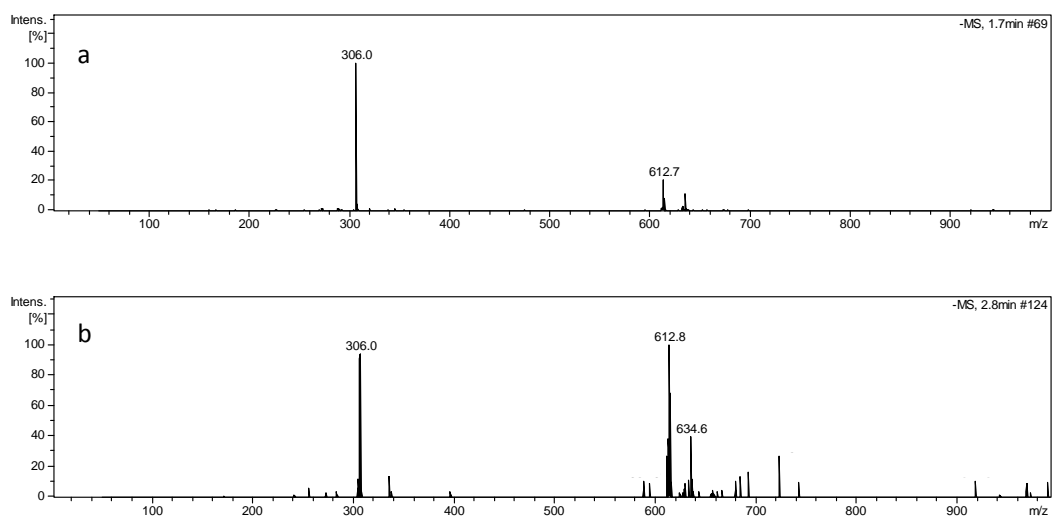

Fig. S5 – ESI-MS data (negative mode) obtained for GSH (a) and GSH with diaqua-Ru<sub>2</sub> complex immediately after mixing the solutions (b)

**Table S1** – Observed rate constants ( $k_{\text{obs}}$ ) obtained from the kinetic traces (at 350 nm) for the first step of the reaction of the diaqua-Ru<sub>2</sub> complex (0.2 mmol L<sup>-1</sup>) with glutathione at different concentrations (10 °C and acetate buffer 20 mmol L<sup>-1</sup> pH 5.0).

| GSH (mol L <sup>-1</sup> ) | $k_{\text{obs}}$ (s <sup>-1</sup> ) |
|----------------------------|-------------------------------------|
| $2.0 \times 10^{-3}$       | 42.7                                |
| $3.0 \times 10^{-3}$       | 64.0                                |
| $4.0 \times 10^{-3}$       | 91.1                                |
| $5.0 \times 10^{-3}$       | 111                                 |
| $6.0 \times 10^{-3}$       | 140                                 |
| $7.0 \times 10^{-3}$       | 162                                 |
| $8.0 \times 10^{-3}$       | 187                                 |
| $9.0 \times 10^{-3}$       | 208                                 |
| $1.0 \times 10^{-2}$       | 236                                 |
| $1.5 \times 10^{-2}$       | 345                                 |
| $2.0 \times 10^{-2}$       | 449                                 |

**Table S2** – Observed rate constants ( $k_{\text{obs}}$ ) obtained from the kinetic traces (at 425 nm) for the second step of the reaction of the diaqua-Ru<sub>2</sub> complex (0.1 mmol L<sup>-1</sup>) with glutathione at different concentrations (10 °C and acetate buffer 20 mmol L<sup>-1</sup> pH 5.0).

| GSH (mol L <sup>-1</sup> ) | $k_{\text{obs}}$ (s <sup>-1</sup> ) |
|----------------------------|-------------------------------------|
| $1.0 \times 10^{-3}$       | 10.4                                |
| $2.0 \times 10^{-3}$       | 18.6                                |
| $3.0 \times 10^{-3}$       | 23.7                                |
| $4.0 \times 10^{-3}$       | 27.0                                |
| $5.0 \times 10^{-3}$       | 29.0                                |
| $6.0 \times 10^{-3}$       | 31.4                                |
| $7.0 \times 10^{-3}$       | 34.2                                |
| $8.0 \times 10^{-3}$       | 36.5                                |
| $2.5 \times 10^{-2}$       | 50.2                                |
| $5.0 \times 10^{-2}$       | 57.3                                |
| $7.5 \times 10^{-2}$       | 59.6                                |

**Table S3** – Observed rate constants ( $k_{\text{obs}}$ ) obtained from the kinetic traces (at 350 nm) for the first step of the reaction of the diaqua-Ru<sub>2</sub> complex (0.2 mmol L<sup>-1</sup>) with glutathione (10 mmol L<sup>-1</sup>) at different temperatures (acetate buffer 20 mmol L<sup>-1</sup> pH 5.0).

| Temperature (°C) | $k_{\text{obs}}$ (s <sup>-1</sup> ) |
|------------------|-------------------------------------|
| 5.0              | 140                                 |
| 10.6             | 266                                 |
| 15.5             | 413                                 |
| 21.0             | 658                                 |
| 25.4             | 917                                 |

**Table S4** – Observed rate constants ( $k_{\text{obs}}$ ) obtained from the kinetic traces (at 425 nm) for the first and second steps of the reaction of the diaqua-Ru<sub>2</sub> complex (0.6 mmol L<sup>-1</sup>) with different concentrations of ascorbic acid (pH 5.0, 10 °C).

| H <sub>2</sub> A (mol L <sup>-1</sup> ) | $k_{\text{obs}}$ (s <sup>-1</sup> ) |             |
|-----------------------------------------|-------------------------------------|-------------|
|                                         | first step                          | second step |
| 6.0×10 <sup>-3</sup>                    | 3.22                                | 0.739       |
| 9.0×10 <sup>-3</sup>                    | 4.46                                | 1.10        |
| 1.2×10 <sup>-2</sup>                    | 5.45                                | 1.36        |
| 1.5×10 <sup>-2</sup>                    | 7.17                                | 2.04        |
| 1.8×10 <sup>-2</sup>                    | 8.11                                | 2.34        |
| 2.1×10 <sup>-2</sup>                    | 8.94                                | 2.66        |
| 2.4×10 <sup>-2</sup>                    | 10.3                                | 3.19        |
| 2.7×10 <sup>-2</sup>                    | 11.2                                | 3.48        |
| 3.0×10 <sup>-2</sup>                    | 12.7                                | 4.14        |
| 4.5×10 <sup>-2</sup>                    | 18.6                                | 6.19        |
| 6.0×10 <sup>-2</sup>                    | 23.9                                | 7.96        |

**Table S5** – Observed rate constants ( $k_{\text{obs}}$ ) obtained from the kinetic traces (at 425 nm) for the first and second steps of the reaction of the diaqua-Ru<sub>2</sub> complex (0.6 mmol L<sup>-1</sup>, pH 5.0) with ascorbic acid at different temperatures ( $\text{H}_2\text{A} = 30 \text{ mmol L}^{-1}$ ) and pressures ( $\text{H}_2\text{A} = 18 \text{ mmol L}^{-1}$ ).

| Temperature<br>(°C) | Pressure<br>(MPa) | $k_{\text{obs}}$ (s <sup>-1</sup> ) |             |
|---------------------|-------------------|-------------------------------------|-------------|
|                     |                   | first step                          | second step |
| 4.5                 | 10.13             | 3.86                                | 1.02        |
| 4.5                 | 50.66             | 3.40                                | 0.89        |
| 4.5                 | 91.18             | 3.05                                | 0.75        |
| 4.5                 | 131.7             | 2.72                                | 0.66        |
| 5.0                 | ambient           | 8.79                                | 2.67        |
| 10.7                | ambient           | 18.1                                | 5.85        |
| 15.1                | ambient           | 27.7                                | 9.09        |
| 20.1                | ambient           | 52.7                                | 20.2        |
| 25.1                | ambient           | 101                                 | 37.5        |
| 29.7                | ambient           | 160                                 | 54.7        |
| 34.4                | ambient           | 260                                 | 86.4        |

**Table S6** – Observed rate constants ( $k_{\text{obs}}$ ) obtained from the kinetic traces (at 425 nm) for the first and second steps of the reaction of the diaqua-Ru<sub>2</sub> complex (0.6 mmol L<sup>-1</sup>) with ascorbic acid (18 mmol L<sup>-1</sup>) in different chloride concentrations (pH 5.0, 10 °C).

| NaCl (mol L <sup>-1</sup> ) | $k_{\text{obs}}$ (s <sup>-1</sup> ) |             |
|-----------------------------|-------------------------------------|-------------|
|                             | first step                          | second step |
| 0                           | 9.84                                | 2.69        |
| $7.5 \times 10^{-3}$        | 8.60                                | 2.33        |
| $3.0 \times 10^{-2}$        | 7.00                                | 1.92        |
| $6.0 \times 10^{-2}$        | 5.26                                | 1.24        |
| $9.0 \times 10^{-2}$        | 4.33                                | 1.02        |
| $1.2 \times 10^{-1}$        | 3.85                                | 0.93        |
| $1.5 \times 10^{-1}$        | 3.04                                | 0.73        |
| $3.0 \times 10^{-1}$        | 1.91                                | 0.40        |
| $6.0 \times 10^{-1}$        | 1.52                                | 0.32        |
